# Supplementary material for: Additive impact of diabetes and Helicobacter pylori infection on all-cause mortality, diabetic mortality, and cardiovascular mortality: A longitudinal nationwide population-based study
Source: Research Square preprint supplement (doi:10.21203/rs.3.rs-4277158/v1), 2024-04-25
Supplement: Supplementary file 1 [file 00017bc4e4dd3af491b0d77f.xlsx]

## Sheet: Sheet 1
	group3
subset(hp6, ucod_leading %in% c(Diabetes, no))~~permth_int,mortstat	crude model		Model 1		Model 2		Model 3
character	95%CI	P	95%CI	P	95%CI	P	95%CI	P
H_pylori-/DM-	ref		ref		ref		ref
H_pylori-/DM+	63.18(17.38,229.59)	<0.0001	18.34(4.99,67.35)	<0.0001	12.30( 5.81, 26.04)	<0.0001	6.82(1.34,34.67)	0.02
H_pylori+/DM-	2.46( 0.59, 10.29)	0.22	1.49(0.36, 6.25)	0.58	1.20( 0.39, 3.68)	0.75	1.09(0.28, 4.20)	0.9
H_pylori+/DM+	57.57(16.54,200.33)	<0.0001	17.09(4.88,59.92)	<0.0001	13.50( 6.70, 27.17)	<0.0001	8.33(1.88,36.87)	0.01
p for trend(character2integer)		<0.0001		<0.0001		<0.0001		<0.001
group3
crudel model: group3
model 1: group3, age, sex
model 2: group3, age, sex, eth1, marital, Family_income, edu
model 3: group3, age, sex, eth1, marital, Family_income, edu, BMI, waist_circumference, TG, total_cholesterol, HDL, Total_bilirubin, HbA1c, smoke, UACR
