# Supplementary material for: Additive impact of diabetes and Helicobacter pylori infection on all-cause mortality, diabetic mortality, and cardiovascular mortality: A longitudinal nationwide population-based study
Source: Research Square preprint supplement (doi:10.21203/rs.3.rs-4277158/v1), 2024-04-25
Supplement: Supplementary file 2 [file 028c9a42a46a75a970222616.xlsx]

## Sheet: Sheet 1
	group3
hp7~~permth_int,mortstat	crude model		Model 1		Model 2		Model 3
character	95%CI	P	95%CI	P	95%CI	P	95%CI	P
H_pylori-/DM-	ref		ref		ref		ref
H_pylori-/DM+	1.89(1.54,2.32)	<0.0001	1.50(1.19,1.90)	<0.001	1.41(1.11,1.79)	0.01	1.29(1.04,1.62)	0.01
H_pylori+/DM-	1.05(0.89,1.22)	0.58	1.05(0.90,1.23)	0.56	1.06(0.90,1.26)	0.46	1.14(0.97,1.34)	0.12
H_pylori+/DM+	2.13(1.68,2.70)	<0.0001	1.66(1.25,2.21)	<0.001	1.50(1.20,1.87)	<0.001	1.37(1.07,1.76)	0.02
p for trend(character2integer)		<0.0001		<0.0001		<0.0001		0.02
group3
crudel model: group3
model 1: group3, age, sex
model 2: group3, age, sex, eth1, marital, Family_income
model 3: group3, age, sex, marital, Family_income, BMI, waist_circumference, TG, total_cholesterol, HDL, Total_bilirubin, smoke, UACR, alcohol.user
