# Supplementary material for: Additive impact of diabetes and Helicobacter pylori infection on all-cause mortality, diabetic mortality, and cardiovascular mortality: A longitudinal nationwide population-based study
Source: Research Square preprint supplement (doi:10.21203/rs.3.rs-4277158/v1), 2024-04-25
Supplement: Supplementary file 3 [file 4102540450ef55d065fd336b.xlsx]

## Sheet: Sheet 1
	group3
subset(hp7, ucod_leading %in% c(heart, Cerebrovascular, no))~~permth_int,mortstat	crude model		Model 1		Model 2
character	95%CI	P	95%CI	P	95%CI	P
H_pylori-/DM-	ref		ref		ref
H_pylori-/DM+	2.94(2.08,4.15)	<0.0001	1.84(1.30,2.61)	<0.001	1.55(1.00, 2.39)	0.05
H_pylori+/DM-	1.18(0.88,1.58)	0.26	1.08(0.82,1.41)	0.58	1.05(0.76, 1.46)	0.77
H_pylori+/DM+	3.20(2.14,4.79)	<0.0001	1.87(1.25,2.81)	0.002	1.92(1.30, 2.84)	<0.001
p for trend(character2integer)		<0.0001		<0.0001		<0.001
group3
crudel model: group3
model 1: group3, age, sex
model 2: group3, age, sex, eth1, marital, Family_income, edu
