# Supplementary material for: Additive impact of diabetes and Helicobacter pylori infection on all-cause mortality, diabetic mortality, and cardiovascular mortality: A longitudinal nationwide population-based study
Source: Research Square preprint supplement (doi:10.21203/rs.3.rs-4277158/v1), 2024-04-25
Supplement: Supplementary file 4 [file 448b24525f71247fb7cb71da.xlsx]

## Sheet: Sheet 1
	group3
hp6~~permth_int,mortstat	crude model		Model 1		Model 2		Model 3
character	95%CI	P	95%CI	P	95%CI	P	95%CI	P
H_pylori-/DM-	ref		ref		ref		ref
H_pylori-/DM+	3.30(2.67,4.07)	<0.0001	1.69(1.24,2.33)	0.001	1.44(1.12,1.84)	0.004	1.30(1.04,1.63)	0.02
H_pylori+/DM-	1.32(1.13,1.55)	<0.001	0.95(0.81,1.11)	0.51	1.00(0.84,1.18)	0.97	1.09(0.93,1.27)	0.28
H_pylori+/DM+	3.54(2.78,4.52)	<0.0001	1.98(1.31,3.01)	<0.001	1.56(1.24,1.96)	<0.001	1.35(1.05,1.74)	0.02
p for trend(character2integer)		<0.0001		<0.0001		<0.0001		0.01
group3
crudel model: group3
model 1: group3, age, sex
model 2: group3, age, sex, eth1, marital, Family_income
model 3: group3, age, sex, marital, Family_income, BMI, waist_circumference, TG, total_cholesterol, HDL, Total_bilirubin, smoke, UACR, alcohol.user
