# Supplementary material for: Additive impact of diabetes and Helicobacter pylori infection on all-cause mortality, diabetic mortality, and cardiovascular mortality: A longitudinal nationwide population-based study
Source: Research Square preprint supplement (doi:10.21203/rs.3.rs-4277158/v1), 2024-04-25
Supplement: Supplementary file 5 [file 478473cf6925c9baeba97dd0.xlsx]

## Sheet: Sheet1
character	H_pylori-/DM-	H_pylori-/DM+	p	H_pylori+/DM-	p	H_pylori+/DM+	p	p for trend(character2integer)	p for interaction
AGE									0.728
20-60	ref	26.131(0.102, 6.690693e+03)	0.249	0.654(0.020, 2.175000e+01)	0.812	46.533(0.160, 1.351617e+04)	0.185	0.377
60-85	ref	15.3(2.811,8.327500e+01)	0.002	1.8(0.320,1.012500e+01)	0.505	15.184(2.969,7.765200e+01)	0.001	0.433
sex									0.475
Male	ref	59.224(3.669,9.559940e+02)	0.004	3.375(0.287,3.976000e+01)	0.334	65.417(5.505,7.773840e+02)	<0.001	<0.001
Female	ref	18.728(3.379,1.037840e+02)	<0.001	1.479(0.240,9.107000e+00)	0.673	23.848(3.645,1.560280e+02)	<0.001	<0.001
Hypertension									0.002
yes	ref	14.084(2.307,8.598800e+01)	0.004	1.951(0.347,1.095600e+01)	0.448	24.975(4.775,1.306310e+02)	<0.001	0.001
no	ref	203.797(2.474,1.678515e+04)	0.018	2.583(0.086,7.733500e+01)	0.584	1.192(0.016,8.667800e+01)	0.936	0.273
