# Supplementary material for: Additive impact of diabetes and Helicobacter pylori infection on all-cause mortality, diabetic mortality, and cardiovascular mortality: A longitudinal nationwide population-based study
Source: Research Square preprint supplement (doi:10.21203/rs.3.rs-4277158/v1), 2024-04-25
Supplement: Supplementary file 6 [file 5f5cdcbb453f6e133f8f1895.xlsx]

## Sheet: Sheet 1
	group3
subset(hp5, ucod_leading %in% c(Diabetes, no))~~permth_int,mortstat	crude model		Model 1		Model 2		Model 3
character	95%CI	P	95%CI	P	95%CI	P	95%CI	P
H_pylori-/DM-	ref		ref		ref		ref
H_pylori-/DM+	68.86(19.21,246.85)	<0.0001	18.68(5.16,67.60)	<0.0001	13.05( 6.38, 26.71)	<0.0001	6.83(1.36,34.36)	0.02
H_pylori+/DM-	2.46( 0.59, 10.28)	0.22	1.47(0.35, 6.18)	0.60	1.29( 0.35, 4.71)	0.72	1.05(0.23, 4.82)	0.95
H_pylori+/DM+	65.23(19.00,223.89)	<0.0001	18.36(5.32,63.45)	<0.0001	15.81( 8.10, 30.86)	<0.0001	9.17(2.11,39.88)	0.003
p for trend(character2integer)		<0.0001		<0.0001		<0.0001		<0.0001
group3
crudel model: group3
model 1: group3, age, sex
model 2: group3, age, sex, eth1, marital, Family_income, edu
model 3: group3, age, sex, eth1, marital, Family_income, edu, BMI, waist_circumference, TG, total_cholesterol, HDL, Total_bilirubin, HbA1c, smoke, UACR
