# Supplementary material for: Additive impact of diabetes and Helicobacter pylori infection on all-cause mortality, diabetic mortality, and cardiovascular mortality: A longitudinal nationwide population-based study
Source: Research Square preprint supplement (doi:10.21203/rs.3.rs-4277158/v1), 2024-04-25
Supplement: Supplementary file 7 [file 67e2f13da0cc30c0b1dcae24.xlsx]

## Sheet: Sheet1
character	H_pylori-/DM-	H_pylori-/DM+	p	H_pylori+/DM-	p	H_pylori+/DM+	p	p for trend(character2integer)	p for interaction
AGE									< 0.0001
20-60	ref	2.255(1.110,4.581)	0.025	1.58(1.141,2.187)	0.006	2.253(1.130,4.493)	0.021	0.002
60-85	ref	1.173(0.853,1.612)	0.326	0.864(0.719,1.037)	0.116	1.007(0.750,1.354)	0.961	0.82
sex									0.164
Male	ref	1.142(0.736,1.773)	0.553	1.284(1.036,1.593)	0.023	1.391(0.930,2.081)	0.109	0.096
Female	ref	2.316(1.582,3.390)	<0.0001	1.164(0.913,1.484)	0.221	2.555(1.643,3.973)	<0.0001	<0.0001
Hypertension									< 0.001
yes	ref	1.275(0.905,1.795)	0.164	0.97(0.794,1.184)	0.762	1.307(0.956,1.786)	0.094	0.608
no	ref	2.247(1.288,3.917)	0.004	1.444(1.099,1.898)	0.008	1.422(0.772,2.616)	0.259	0.018
