# Supplementary material for: Additive impact of diabetes and Helicobacter pylori infection on all-cause mortality, diabetic mortality, and cardiovascular mortality: A longitudinal nationwide population-based study
Source: Research Square preprint supplement (doi:10.21203/rs.3.rs-4277158/v1), 2024-04-25
Supplement: Supplementary file 8 [file 7c6cf38909b29084e6ffe290.xlsx]

## Sheet: Sheet 1
	group3
subset(hp6, ucod_leading %in% c(heart, Cerebrovascular, no))~~permth_int,mortstat	crude model		Model 1		Model 2
character	95%CI	P	95%CI	P	95%CI	P
H_pylori-/DM-	ref		ref		ref
H_pylori-/DM+	5.79(3.82,8.76)	<0.0001	1.79(1.21,2.63)	0.003	1.63(1.04,2.54)	0.03
H_pylori+/DM-	1.47(1.09,1.97)	0.01	1.09(0.82,1.47)	0.51	1.03(0.68,1.57)	0.89
H_pylori+/DM+	5.78(4.06,8.21)	<0.0001	1.88(1.32,2.68)	<0.001	2.08(1.40,3.10)	<0.001
p for trend(character2integer)		<0.0001		<0.0001		<0.0001
group3
crudel model: group3
model 1: group3, age, sex
model 2: group3, age, sex, eth1, marital, Family_income, edu
