# Supplementary material for: Additive impact of diabetes and Helicobacter pylori infection on all-cause mortality, diabetic mortality, and cardiovascular mortality: A longitudinal nationwide population-based study
Source: Research Square preprint supplement (doi:10.21203/rs.3.rs-4277158/v1), 2024-04-25
Supplement: Supplementary file 9 [file 8db6333cd75c9d82732b6739.xlsx]

## Sheet: Sheet1
character	H_pylori-/DM-	H_pylori-/DM+	p	H_pylori+/DM-	p	H_pylori+/DM+	p	p for trend(character2integer)	p for interaction
AGE									< 0.0001
20-60	ref	2.533(0.769, 8.344)	0.126	1.443(0.739, 2.820)	0.283	3.067(0.782,12.037)	0.108	0.075
60-85	ref	1.266(0.761, 2.105)	0.364	0.988(0.708, 1.378)	0.941	1.432(0.831, 2.467)	0.196	0.74
sex									0.081
Male	ref	1.272(0.610, 2.654)	0.521	1.225(0.824, 1.822)	0.315	1.699(0.873, 3.306)	0.119	0.1
Female	ref	4.563(2.348, 8.864)	<0.0001	1.757(1.112, 2.776)	0.016	4.466(2.016, 9.895)	<0.001	<0.0001
Hypertension									0.061
yes	ref	1.795(1.006, 3.202)	0.048	1.155(0.817, 1.632)	0.416	1.817(1.096, 3.011)	0.021	0.132
no	ref	1.839(0.533,6.341000e+00)	0.335	1.662(0.909,3.038000e+00)	0.099	2.892(0.926,9.031000e+00)	0.068	0.117
