# Supplementary material for: Additive impact of diabetes and Helicobacter pylori infection on all-cause mortality, diabetic mortality, and cardiovascular mortality: A longitudinal nationwide population-based study
Source: Research Square preprint supplement (doi:10.21203/rs.3.rs-4277158/v1), 2024-04-25
Supplement: Supplementary file 10 [file 8f7513876a984db5df8e2733.xlsx]

## Sheet: Sheet 1
	group3
subset(hp5, ucod_leading %in% c(heart, Cerebrovascular, no))~~permth_int,mortstat	crude model		Model 1		Model 2
character	95%CI	P	95%CI	P	95%CI	P
H_pylori-/DM-	ref		ref		ref
H_pylori-/DM+	5.75(4.07,8.12)	<0.0001	1.89(1.33,2.67)	<0.001	1.73(1.13,2.63)	0.01
H_pylori+/DM-	1.54(1.16,2.05)	0.003	1.14(1.02,1.27)	0.02	1.01(0.74,1.39)	0.93
H_pylori+/DM+	6.25(4.21,9.27)	<0.0001	2.03(1.36,3.01)	<0.001	2.02(1.37,2.97)	<0.001
p for trend(character2integer)		<0.0001		<0.0001		<0.0001
group3
crudel model: group3
model 1: group3, age, sex
model 2: group3, age, sex, eth1, marital, Family_income, edu
