# Supplementary material for: Additive impact of diabetes and Helicobacter pylori infection on all-cause mortality, diabetic mortality, and cardiovascular mortality: A longitudinal nationwide population-based study
Source: Research Square preprint supplement (doi:10.21203/rs.3.rs-4277158/v1), 2024-04-25
Supplement: Supplementary file 11 [file a7964ed4ec1f910535a3ddb1.xlsx]

## Sheet: Descr
	[ALL] N=2719	H_pylori-/DM- N=1362	H_pylori-/DM+ N=140	H_pylori+/DM- N=1011	H_pylori+/DM+ N=206	p.overall
hp	1.20 (1.11)	0.31 (0.19)	0.38 (0.23)	2.31 (0.71)	2.24 (0.70)	0.000
age	50.5 (18.3)	46.5 (18.3)	64.2 (12.7)	51.6 (17.8)	63.0 (12.0)	<0.001
sex:						0.327
Female	1350 (49.7%)	698 (51.2%)	65 (46.4%)	483 (47.8%)	104 (50.5%)
Male	1369 (50.3%)	664 (48.8%)	75 (53.6%)	528 (52.2%)	102 (49.5%)
eth1:						.
Mexican American	736 (27.1%)	220 (16.2%)	29 (20.7%)	398 (39.4%)	89 (43.2%)
Non-Hispanic Black	454 (16.7%)	171 (12.6%)	23 (16.4%)	210 (20.8%)	50 (24.3%)
Non-Hispanic White	1273 (46.8%)	877 (64.4%)	78 (55.7%)	279 (27.6%)	39 (18.9%)
Other Hispanic	183 (6.73%)	62 (4.55%)	7 (5.00%)	95 (9.40%)	19 (9.22%)
Other Race - Including Multi-Racial	73 (2.68%)	32 (2.35%)	3 (2.14%)	29 (2.87%)	9 (4.37%)
marital:						<0.001
Living with partner	117 (4.30%)	53 (3.89%)	3 (2.14%)	55 (5.44%)	6 (2.91%)
Married	1569 (57.7%)	764 (56.1%)	86 (61.4%)	595 (58.9%)	124 (60.2%)
Never married	427 (15.7%)	280 (20.6%)	7 (5.00%)	130 (12.9%)	10 (4.85%)
other	606 (22.3%)	265 (19.5%)	44 (31.4%)	231 (22.8%)	66 (32.0%)
edu:						<0.001
9-11th Grade (Includes 12th grade with no diploma)	534 (19.6%)	192 (14.1%)	32 (22.9%)	244 (24.1%)	66 (32.0%)
College Graduate or above	430 (15.8%)	323 (23.7%)	12 (8.57%)	87 (8.61%)	8 (3.88%)
High School Grad/GED or Equivalent	615 (22.6%)	337 (24.7%)	45 (32.1%)	212 (21.0%)	21 (10.2%)
Less Than 9th Grade	503 (18.5%)	102 (7.49%)	26 (18.6%)	293 (29.0%)	82 (39.8%)
Some College or AA degree	637 (23.4%)	408 (30.0%)	25 (17.9%)	175 (17.3%)	29 (14.1%)
BMI	27.8 (5.52)	27.4 (5.53)	30.0 (5.84)	27.7 (5.25)	30.3 (5.62)	<0.001
waist_circumference	95.5 (14.0)	93.9 (14.1)	105 (13.5)	94.9 (13.3)	104 (12.4)	<0.001
hemoglobin_g.dl	14.4 (1.47)	14.5 (1.43)	14.4 (1.50)	14.4 (1.51)	14.1 (1.55)	0.002
PLT	263 (65.1)	263 (65.9)	249 (62.7)	266 (63.5)	254 (67.7)	0.009
HbA1c	5.60 (1.13)	5.22 (0.36)	7.68 (1.92)	5.36 (0.35)	7.86 (1.89)	0.000
Total_bilirubin	9.88 (4.96)	10.1 (5.24)	9.33 (4.79)	9.80 (4.69)	9.28 (4.44)	0.067
TG	1.98 (1.69)	1.80 (1.49)	2.62 (2.06)	1.99 (1.68)	2.75 (2.30)	<0.001
total_cholesterol	5.28 (1.04)	5.23 (0.99)	5.26 (1.06)	5.34 (1.06)	5.37 (1.18)	0.053
HDL	1.31 (0.40)	1.36 (0.41)	1.16 (0.35)	1.29 (0.39)	1.18 (0.35)	<0.001
LDL	3.07 (0.89)	3.05 (0.88)	2.90 (0.87)	3.14 (0.91)	2.95 (0.87)	0.001
UACR	57.3 (481)	23.4 (117)	202 (759)	26.5 (132)	335 (1547)	<0.001
Hypertension:						<0.001
no	1597 (58.7%)	897 (65.9%)	44 (31.4%)	589 (58.3%)	67 (32.5%)
yes	1122 (41.3%)	465 (34.1%)	96 (68.6%)	422 (41.7%)	139 (67.5%)
mortstat	0.32 (0.47)	0.24 (0.43)	0.64 (0.48)	0.31 (0.46)	0.62 (0.49)	<0.001
smoke:						<0.001
former	747 (27.5%)	342 (25.1%)	61 (43.6%)	268 (26.5%)	76 (36.9%)
never	1378 (50.7%)	729 (53.5%)	62 (44.3%)	491 (48.6%)	96 (46.6%)
now	594 (21.8%)	291 (21.4%)	17 (12.1%)	252 (24.9%)	34 (16.5%)
alcohol.user:						<0.001
former	528 (19.4%)	191 (14.0%)	48 (34.3%)	207 (20.5%)	82 (39.8%)
heavy	548 (20.2%)	270 (19.8%)	17 (12.1%)	234 (23.1%)	27 (13.1%)
mild	888 (32.7%)	499 (36.6%)	42 (30.0%)	298 (29.5%)	49 (23.8%)
moderate	373 (13.7%)	222 (16.3%)	9 (6.43%)	129 (12.8%)	13 (6.31%)
never	382 (14.0%)	180 (13.2%)	24 (17.1%)	143 (14.1%)	35 (17.0%)
Family_income:						<0.001
High	884 (32.5%)	582 (42.7%)	39 (27.9%)	230 (22.7%)	33 (16.0%)
Low	818 (30.1%)	294 (21.6%)	42 (30.0%)	393 (38.9%)	89 (43.2%)
Medium	1017 (37.4%)	486 (35.7%)	59 (42.1%)	388 (38.4%)	84 (40.8%)
