# Supplementary material for: Additive impact of diabetes and Helicobacter pylori infection on all-cause mortality, diabetic mortality, and cardiovascular mortality: A longitudinal nationwide population-based study
Source: Research Square preprint supplement (doi:10.21203/rs.3.rs-4277158/v1), 2024-04-25
Supplement: Supplementary file 12 [file b176fb43bc4a228b58efa001.xlsx]

## Sheet: Sheet 1
	group3
hp5~~permth_int,mortstat	crude model		Model 1		Model 2		Model 3
character	95%CI	P	95%CI	P	95%CI	P	95%CI	P
H_pylori-/DM-	ref		ref		ref		ref
H_pylori-/DM+	3.69(2.92,4.66)	<0.0001	2.53(2.25,2.88)	<0.001	1.70(1.53,1.88)	0.001	1.48(1.17,1.88)	0.005
H_pylori+/DM-	1.33(1.14,1.55)	<0.001	1.05(0.90,1.23)	0.56	1.02(0.87,1.20)	0.85	1.10(0.87,1.19)	0.27
H_pylori+/DM+	3.35(2.73,4.10)	<0.0001	2.56(2.23,2.97)	<0.0001	2.00(1.68,2.41)	<0.0001	1.56(1.25,1.95)	0.01
p for trend(character2integer)		<0.0001		<0.0001		<0.0001		0.003
group3
crudel model: group3
model 1: group3, age, sex
model 2: group3, age, sex, eth1, marital, Family_income
model 3: group3, age, sex, marital, Family_income, BMI, waist_circumference, TG, total_cholesterol, HDL, Total_bilirubin, smoke, UACR, alcohol.user
