# Supplementary material for: Additive impact of diabetes and Helicobacter pylori infection on all-cause mortality, diabetic mortality, and cardiovascular mortality: A longitudinal nationwide population-based study
Source: Research Square preprint supplement (doi:10.21203/rs.3.rs-4277158/v1), 2024-04-25
Supplement: Supplementary file 13 [file ca514e6679064162eaa7b3b0.xlsx]

## Sheet: Sheet 1
	group3
subset(hp7, ucod_leading %in% c(Diabetes, no))~~permth_int,mortstat	crude model		Model 1		Model 2		Model 3
character	95%CI	P	95%CI	P	95%CI	P	95%CI	P
H_pylori-/DM-	ref		ref		ref		ref
H_pylori-/DM+	31.72(9.24,108.88)	<0.0001	18.03(5.23,62.16)	<0.0001	12.92(3.27,51.02)	<0.001	6.81( 3.32, 13.96)	<0.0001
H_pylori+/DM-	1.90(0.45, 7.93)	0.38	1.46(0.35, 6.11)	0.60	1.23(0.25, 6.10)	0.81	1.05( 0.41, 2.72)	0.92
H_pylori+/DM+	35.09(9.79,125.80)	<0.0001	18.38(5.09,66.42)	<0.0001	15.55(4.00,60.36)	<0.0001	9.10( 4.66, 17.78)	<0.0001
p for trend(character2integer)		<0.0001		<0.001		0.002		0.03
group3
crudel model: group3
model 1: group3, age, sex
model 2: group3, age, sex, eth1, marital, Family_income, edu
model 3: group3, age, sex, eth1, marital, Family_income, edu, BMI, waist_circumference, TG, total_cholesterol, HDL, Total_bilirubin, HbA1c, smoke, UACR
